# Supplementary material for: Vacancy engineering of WO3−x nanosheets for electrocatalytic NRR process – a first-principles study
Source: Royal Society of Chemistry journal article supplement (doi:10.1039/d1cp01874d), 2021-01-01
Supplement: d1cp01874d1.pdf [file d1cp01874d1.pdf]

## SUPPORTING INFORMATION

### Vacancy Engineering of WO<sub>3-x</sub> Nanosheets for Electrocatalytic NRR Process - a First-principles Study

Linfei Luo, Bojun Wang, Jianwei Wang\*, Xiaobin Niu\*

#### Calculations

The adsorption energy of each intermediate is adopted as the indicator of every step for nitrogen reduction, taking \*NNH as an example, following equation (1)

$$E_{\text{ad}}^{\text{NNH}} = E_{\text{NNH/sur}} - E_{\text{sur}} - E_{\text{N}_2} - 1/2E_{\text{H}_2} \quad (1)$$

Here, the chemical potential of (H<sup>+</sup> + e<sup>-</sup>) is related to that of a half gaseous H<sub>2</sub>, as  $\mu(\text{H}^+ + \text{e}^-) = 1/2\mu(\text{H}_2) + \mu(\text{e}^-)$ , where  $\mu(\text{e}^-) = eU$ , U is an applied bias against the standard hydrogen electrode (SHE).<sup>1</sup> Given that experiments usually proceed along with a set pH value at room temperature, which spawn vibration entropy, so that corrections should be added in the formula. Gibbs free energy at zero potential therefore follows

$$\Delta G = \Delta E + \Delta E_{\text{ZPE}} - T\Delta S \quad (2)$$

Where E<sub>ZPE</sub> represents the zero-point energy of intermediate obtained by using standard vibrational corrections in the harmonic approximation to the enthalpy and entropy. Because the experiment is presumed to keep ambient throughout the process, ΔT approximates to null.

### Decision of oxygen vacancy

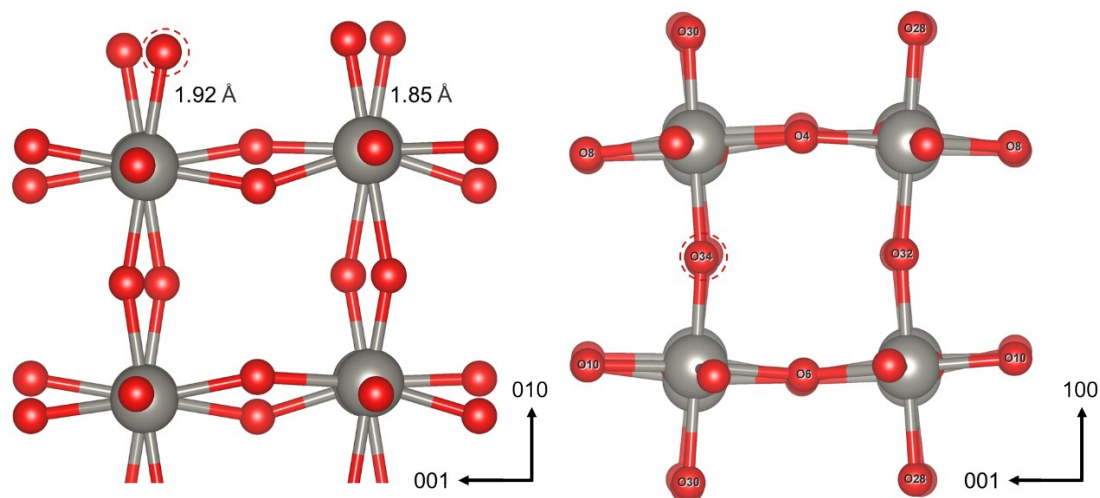

**Figure S1.** Schematic diagram of the  $\text{WO}_3$  microstructure. The side view (left) and the top view (right) of  $\text{WO}_3$  slab model with marked non-equivalent sites in the same plane are shown. Dotted circles mark the O ions to be removed. The W ions and O ions are represented in gray and red respectively.

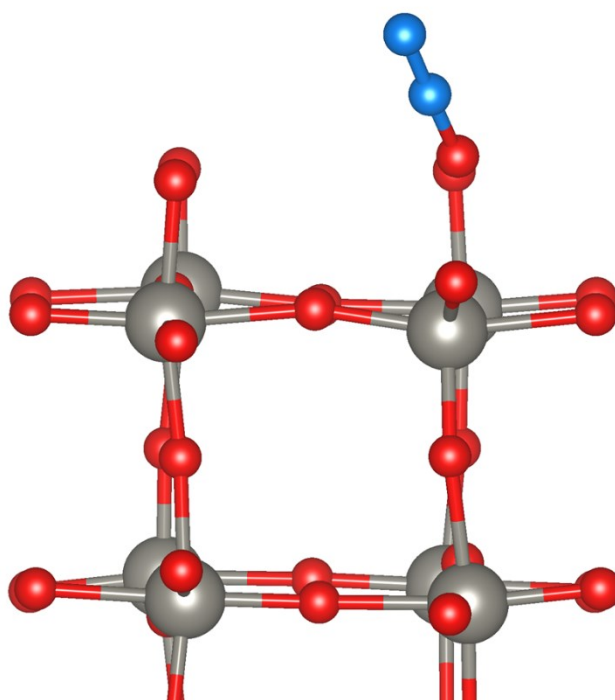

**Figure S2.** Optimized atomic configuration of  $\text{N}_2$  on the fully oxidized  $\text{WO}_3$ . The W, O, and N atoms were represented in gray, red, blue, respectively. The W-O bond broke and  $\text{N}_2\text{O}$  left 2.42 Å apart from the substrate.

## Electronic analysis of N<sub>2</sub>H/P-V<sub>O</sub>-WO<sub>3</sub>

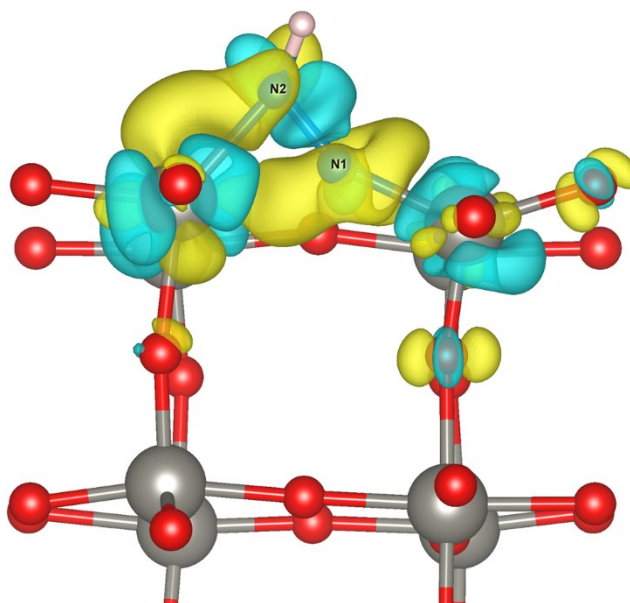

**Figure S3.** Charge difference density of N<sub>2</sub>H on P-V<sub>O</sub> site (cyan stands for electron depletion and yellow for electron accumulation). The W, O, N and H atoms were represented in gray, red, blue (with label), and pink. The isosurface illustrates the configuration with level of 0.005 eÅ<sup>-3</sup>.

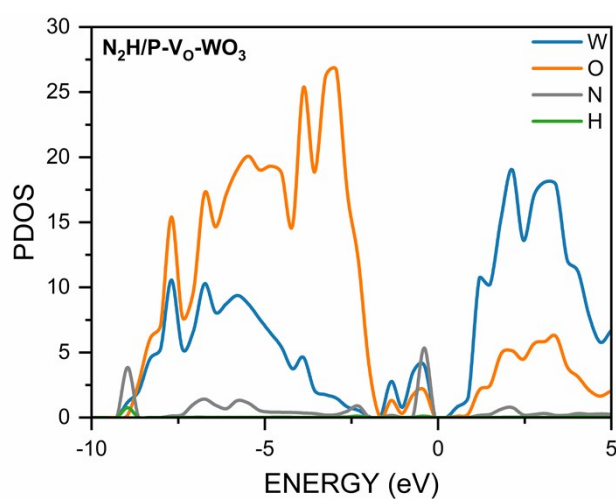

**Figure S4.** Projected electronic densities (PDOS) of states of tungsten (blue), oxygen (orange), nitrogen (gray), and hydrogen (green) within N<sub>2</sub>H/P-V<sub>O</sub>-WO<sub>3</sub>.

**TABLE S1.** Bader charges of dinitrogen at initial adsorption step of the catalytic cycle with different oxygen-defective WO<sub>3-x</sub>.

| Steps                                              | Elements | Charge Difference <sup>Δ</sup> |
|----------------------------------------------------|----------|--------------------------------|
| N <sub>2</sub> /DV <sub>O</sub> -WO <sub>3-x</sub> | N1       | +0.23  e                       |
|                                                    | N2       | -0.25  e                       |
| N <sub>2</sub> /PV <sub>O</sub> -WO <sub>3-x</sub> | N1       | +0.50  e                       |
|                                                    | N2       | +0.24  e                       |

$\Delta$ The charge difference is defined as the charge of adsorbed nitrogen minus that of molecular nitrogen.

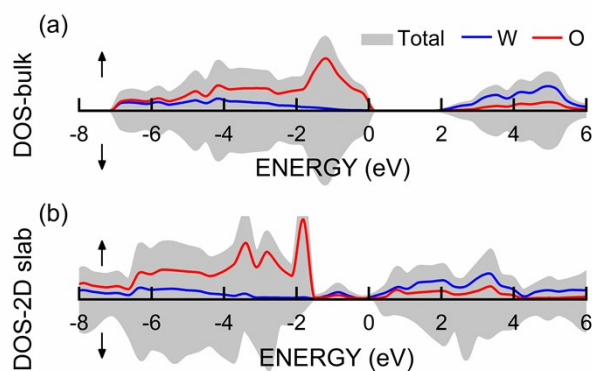

**Figure S5.** DOS of (a) bulk  $\text{WO}_3$  and (b) 2D  $\text{WO}_3$  with PDOS of tungsten (blue) and oxygen (red). For all DOS, zero at the energy scale corresponds to the Fermi level. The bulk  $\text{WO}_3$  shows a prominent semiconductor characteristic as the calculated band gap is around 2.3 eV, which is consistent with other calculation results<sup>2</sup>. The “surface state” appears in the 2D  $\text{WO}_3$  and the Fermi level traverses amidst the conduction band and the “surface state”.

## References

- 1 Nørskov, J. K. *et al.* Origin of the Overpotential for Oxygen Reduction at a Fuel-Cell Cathode. *The Journal of Physical Chemistry B* **108**, 17886-17892, (2004).
- 2 Migas, D. B., Shaposhnikov, V. L., Rodin, V. N. & Borisenko, V. E. Tungsten oxides. I. Effects of oxygen vacancies and doping on electronic and optical properties of different phases of  $\text{WO}_3$ . *Journal of Applied Physics* **108**, 093713, (2010).
